# Supplementary material for: Electrochemically active separators with excellent catalytic ability toward high-performance Li–S batteries
Source: Royal Society of Chemistry journal article supplement (doi:10.1039/c8ta02757a), 2018-01-01
Supplement: c8ta02757a1.pdf [file c8ta02757a1.pdf]

## Supporting Information

# The Electrochemical Active Separator with Excellent Catalytic Ability toward High-Performance Li-S Batteries

Maoxu Wang,<sup>a,b</sup> Lishuang Fan,<sup>a,b</sup> Yue Qiu,<sup>a,b</sup> Dandan Chen,<sup>a,b</sup> Xian Wu,<sup>a,b</sup> Chenyang

Zhao,<sup>a,b</sup> Junhan Cheng,<sup>a,b</sup> Yan Wang,<sup>\*c</sup> Naiqing Zhang,<sup>\*a,c</sup> and Kening Sun<sup>\*a,c</sup>

a. State Key Laboratory of Urban Water Resource and Environment, Harbin Institute of Technology, Harbin 150001, China

b. School of Chemistry and Chemical Engineering, Harbin Institute of Technology, Harbin 150001, China

c. Academy of Fundamental and Interdisciplinary Sciences, Harbin Institute of Technology, Harbin 150001, China

\*Corresponding Author

Naiqing Zhang (znqmww@163.com)

Academy of Fundamental and Interdisciplinary Sciences, Harbin Institute of

Technology, Harbin, China

Tel: +451 86412153      Fax: +86-451-86412153

## Experiment

**Synthesis of VS<sub>4</sub>/G:** Thioacetamide (360 mg) and 120 mg NaVO<sub>4</sub> were dissolved into 100 mL beaker which contain 45 mL deionized water, and then add 15 mL graphene oxide dispersion (8 mg mL<sup>-1</sup>) into the above solution. The mixed solution was stirred for 30 min and then transferred into 100 mL Teflon-lined stainless steel autoclave. Then the autoclave was kept at 160 °C for 12 h, and waiting for the temperature cool to room temperature naturally. The products was collected by centrifugation and washed with absolute ethanol and deionized water for several times. The final product was collected after freeze-drying.

**Synthesis of VS<sub>4</sub>/G-Separator:** The VS<sub>4</sub>/G was dispersed into absolute ethanol and sonicated for 4 h, and then filtrated the mixture of VS<sub>4</sub>/G and ethanol onto a conventional separator (The Celgard 3501 separator). Afterwards, the VS<sub>4</sub>/G-Separator was dried in the oven overnight and cut into circular pieces. The different thickness of VS<sub>4</sub>/G-Separator was fabricated by adjusting the quality of VS<sub>4</sub>/G. The G-Separator was prepared with the same method.

**Material Characterization:** The morphology and microstructure characterization for VS<sub>4</sub>/G and was conducted using a SEM (Hitachi, SU8010) and HRTEM (G2 F20FEI Tecnai G2 F20 microscope at 200 kV). Elemental mapping was performed with SEM. The crystal structure were characterized by X-ray diffraction (PANalytical X'Pert PRO, monochromated Cu K $\alpha$  radiation 40 mA, 40 kV). The method used in the paper is flat sample stage. Step size is 0.013°, scan range from 5° to 90° with a scan rate 1°/min. The sulfur content in the composite was tested by TG thermogravimetric analyzer system. The specific surface area, pore volume and N<sub>2</sub> adsorption/desorption isotherms were measured by using an ASAP 2020 (Micromeritics). X-ray

photoelectron spectroscopy (XPS) was performed using a Thermo Scientific K-Alpha XPS (Fisher Scientific Ltd, Nepean, ON). The energy resolution is 0.5 eV and the step size is 0.1 eV.

**Electrochemical Measurements:** 75 mg sulfur and 25 mg ketjen black were mixed uniformly and placed in an autoclave and heated at 155 °C for 12 h. Sulfur electrodes were fabricated by pasting sulfur slurry (80 wt% sulfur-ketjen black as active material, 10 wt% super P and 10 wt% PVDF binder) onto aluminum foil current collector. The slurry pasted Al foils were vacuum dried at 60°C for 12 h. The sulfur electrodes were then cut into circular pellets and were used as working electrodes. The 2025 coin cells were assembled with Li metal disc as anode in a glovebox filled with Ar. The Celgard 3501 sheet was as the commercial separator. The electrolyte was composed of 1mol/L lithium bis (trifluoromethanesulfonyl) imide (LiTFSI) in a solvent of 1, 3-dioxolane (DOL) and dimethoxymethane (DME) (1:1 ratio by volume) with 2% LiNO<sub>3</sub> addition. CV test was recorded on a CHI 660D electrochemical workstation between 1.8 and 2.8 V. The charge transfer kinetics was investigated by EIS measurements using a PARSTAT 2273 advanced electrochemical system, the frequency range was set between 1 MHz and 1Hz and the amplitude is 10 mV with an ac signal. A Neware battery test system is used to perform charge/discharge measurements, the voltage window is 1.8–2.8 V for various current rates (1 C is equivalent to 1675 mA/g).

## Results

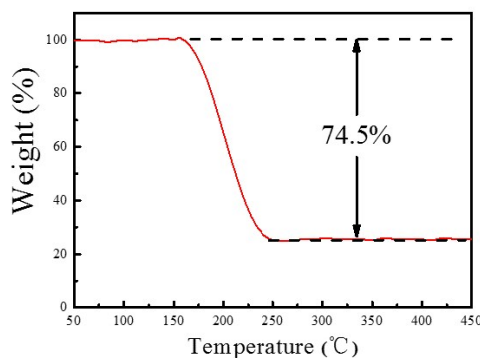

**Figure S1.** Thermogravimetric (TG) curves of sulfur cathodes with ketjen black.

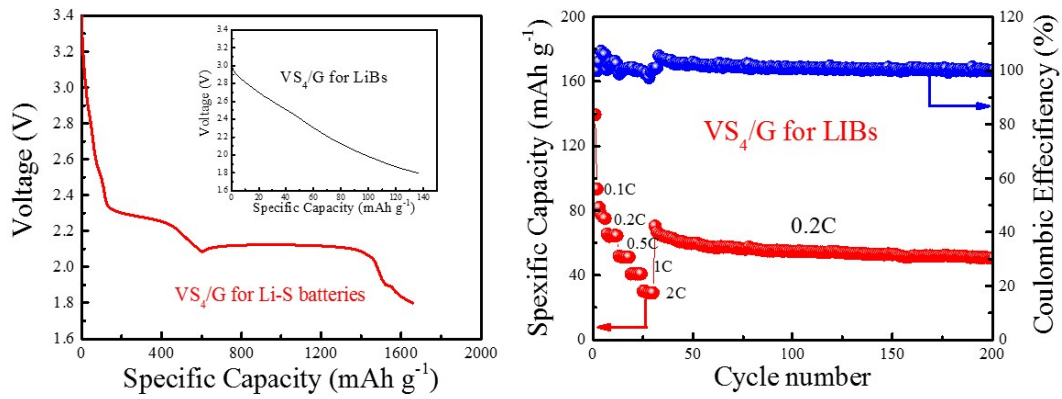

**Figure S2.** a) The discharge profiles of  $\text{VS}_4/\text{G}$ -Separator for Li-S batteries at 0.1 C couple with  $\text{VS}_4/\text{G}$  for LiBs. b) The rate performance and cycle performance of  $\text{VS}_4/\text{G}$  in Li-S batteries system.

**Table S1.** A brief summary of the reported new separator with modified materials for Li-S batteries

| Separator                        | Sulfur wt% | Rate         | Initial Capacity (mAh/g) | Cycled Number | Decay Per Cycle | Ref.      |
|----------------------------------|------------|--------------|--------------------------|---------------|-----------------|-----------|
| $\text{VS}_4/\text{G}$           | 74.5       | 0.5 C<br>2 C | 1050<br>810              | 500<br>2500   | 0.06%<br>0.021% | This work |
| Capsule                          | 63         | 0.5C         | 893                      | 300           | 0.25%           | 1         |
| $\text{Al}_2\text{O}_3/\text{G}$ | 55         | 1 C          | 1333                     | 450           | 0.10%           | 2         |
| Mesoporous Carbon                | 60         | 2 C          | 800                      | 500           | 0.062%          | 3         |
| $\text{MoS}_2$                   | 65         | 0.5 C        | 800                      | 600           | 0.083%          | 4         |
| NbC                              | 66.6       | 0.5 C        | 1082                     | 150           | 0.29%           | 5         |
| $\text{TiO}_2\text{-CB}$         | 60         | 0.5 C        | 1200                     | 500           | 0.12%           | 6         |
| CNF                              | 50         | 0.2 C        | 1000                     | 60            | 6%              | 7         |
| SWCNT                            | 70         | 0.2 C        | 718                      | 150           | 0.11%           | 8         |
| Functionalized CNT               | 70         | 0.5 C        | 1050                     | 400           | 0.11%           | 9         |

## Reference

1. H.-J. P. Jin Xie, Jia-Qi Huang, Wen-Tao Xu, Xiang Chen, and Qiang Zhang, *Angew.Chem. Int.Ed.* 2017, **56**,16223 –16227
2. J.-Y. Hwang, H. M. Kim, S. Shin and Y.-K. Sun, *Advanced Functional Materials*, 2018, **28**, 1704294
3. S. H. Chung and A. Manthiram, *Advanced materials*, 2014, **26**, 7352-7357.
4. Z. A. Ghazi, X. He, A. M. Khattak, N. A. Khan, B. Liang, A. Iqbal, J. Wang, H. Sin, L. Li and Z. Tang, *Advanced materials*, 2017, **29**, 1606817.
5. G. L. W.L Cai, K.L Zhang, G.N Xiao, C Wang, K.F Ye, Y. Z. Z.W Chen, and Yitai Qian, *Advanced Functional Materials*, 2018, **28**, 1704865
6. G. Xu, Q.-b. Yan, S. Wang, A. Kushima, P. Bai, K. Liu, X. Zhang, Z. Tang and J. Li, *Chemical Science*, 2017, **8**, 6619-6625.
7. X. Yu, J. Joseph and A. Manthiram, *Materials Horizons*, 2016, **3**, 314-319.
8. C. H. Chang, S. H. Chung and A. Manthiram, *Small*, 2016, **12**, 174-179.
9. R. Ponraj, A. G. Kannan, J. H. Ahn, J. H. Lee, J. Kang, B. Han and D. W. Kim, *ACS applied materials & interfaces*, 2017, **9**, 38445-38454.
